# Supplementary material for: An analysis of age-standardized suicide rates in Muslim-majority countries in 2000-2019
Source: PubMed Central journal article supplement (PMC9066769; doi:10.1186/s12889-022-13101-3), 2022-05-04
Supplement: 12889_2022_13101_MOESM1_ESM.pdf [file 12889_2022_13101_MOESM1_ESM.pdf]

Fig S1. Age-standardized suicide rate in Muslim-majority countries in 2000-2019 and comparison with the global average

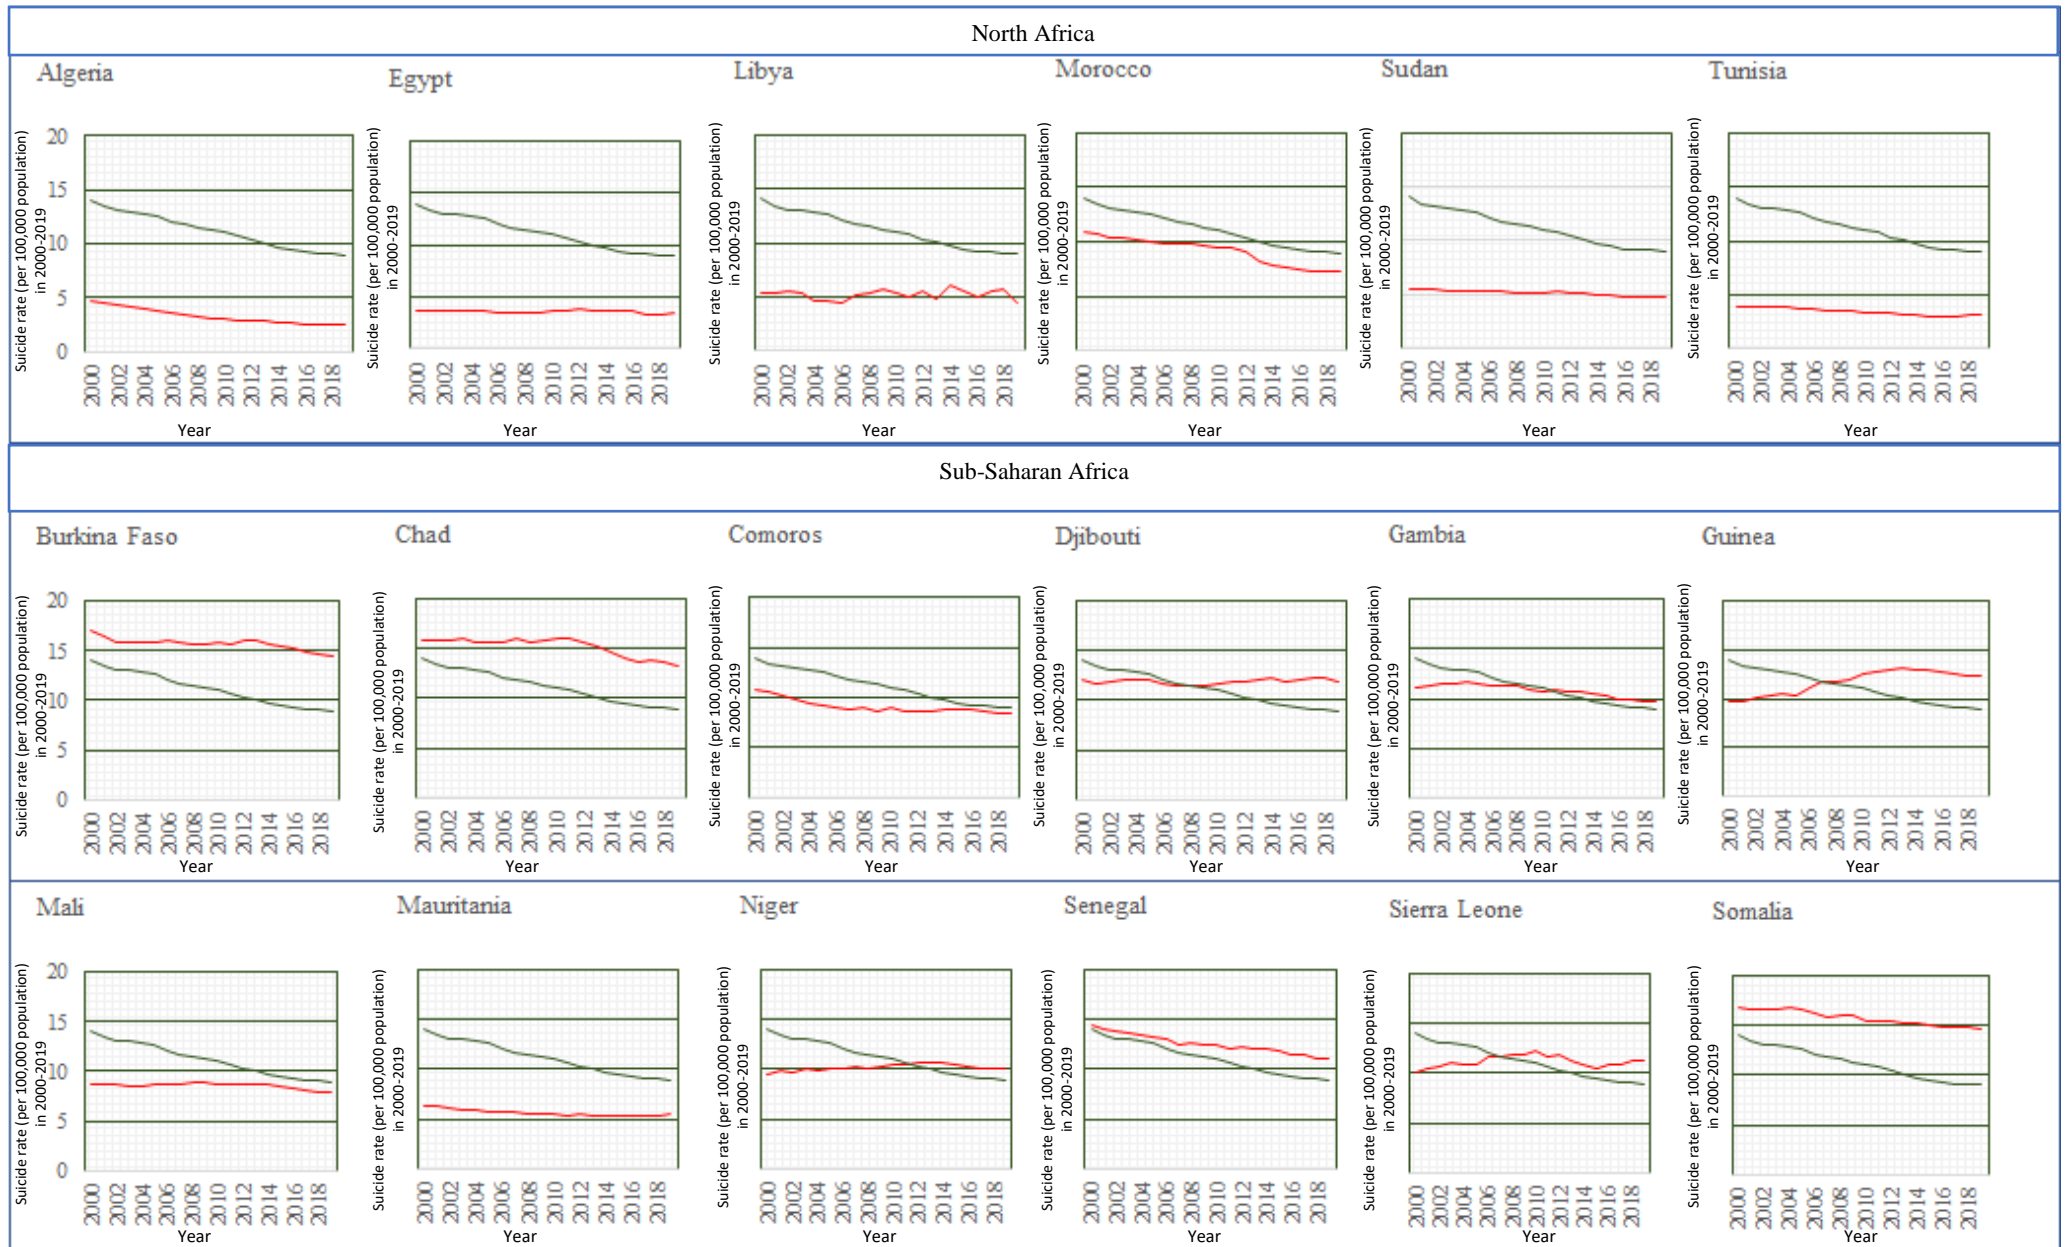

Southern Europe

Western Asia

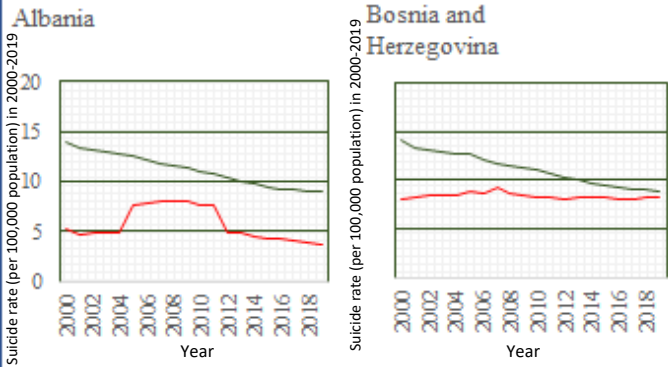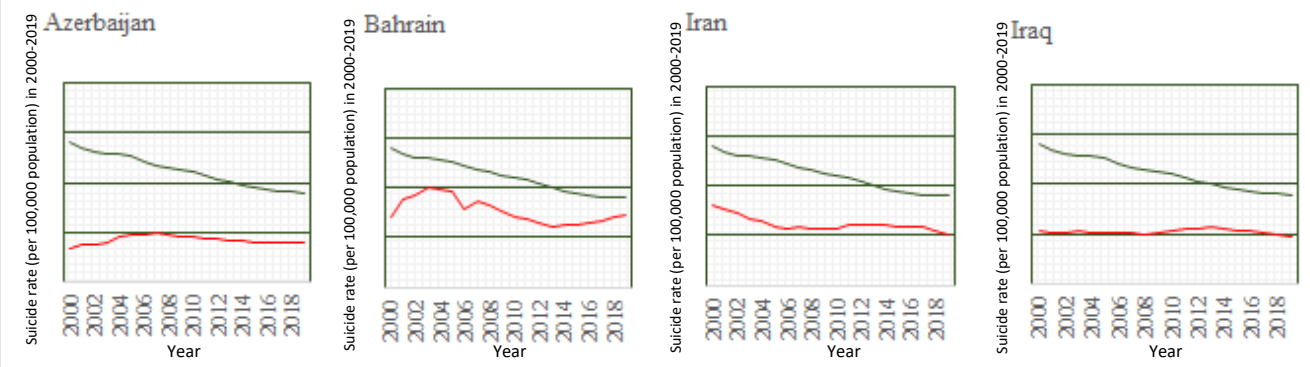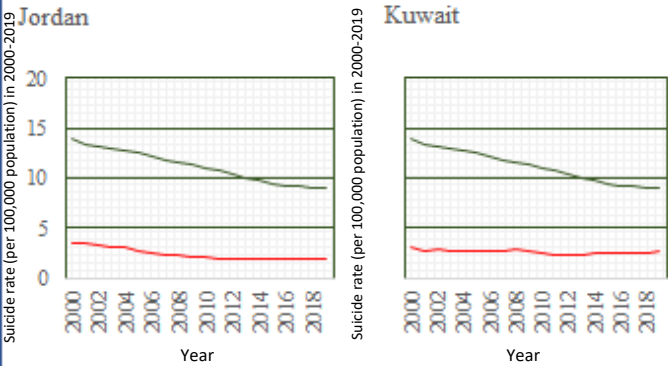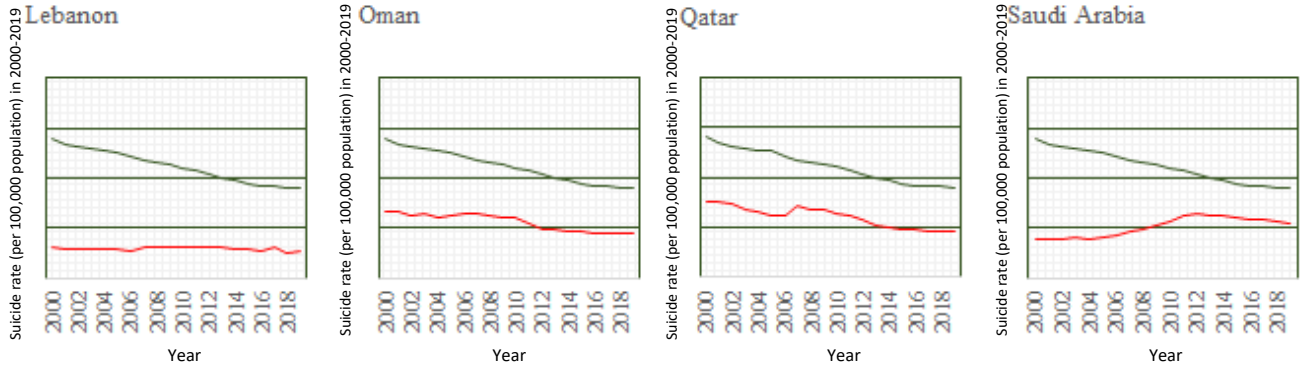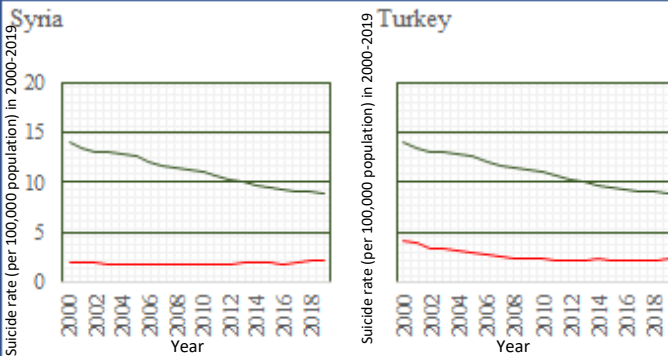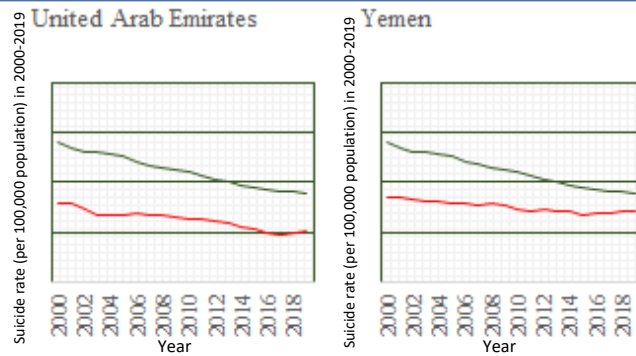

Central Asia

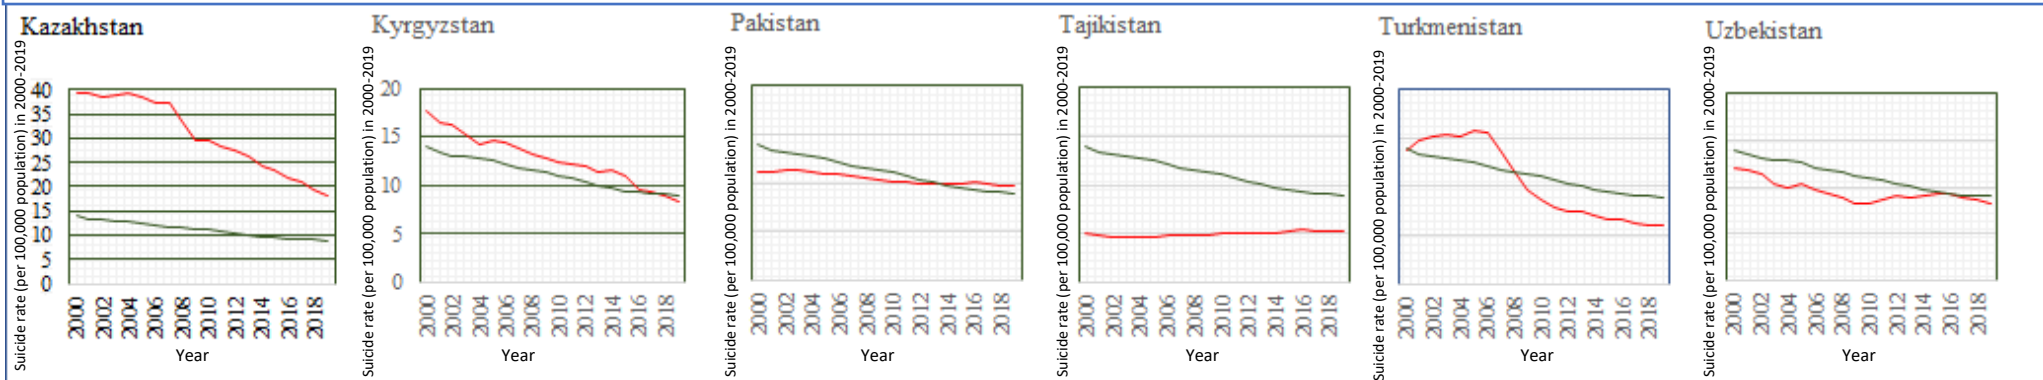

South Asia

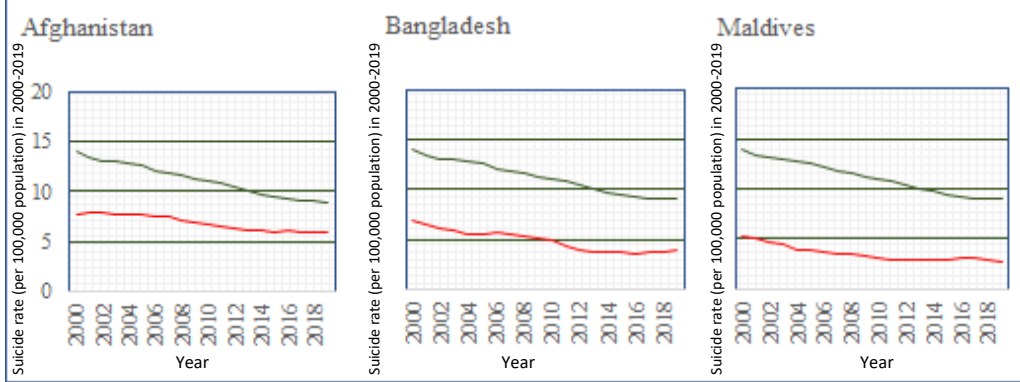

Southeastern Asia

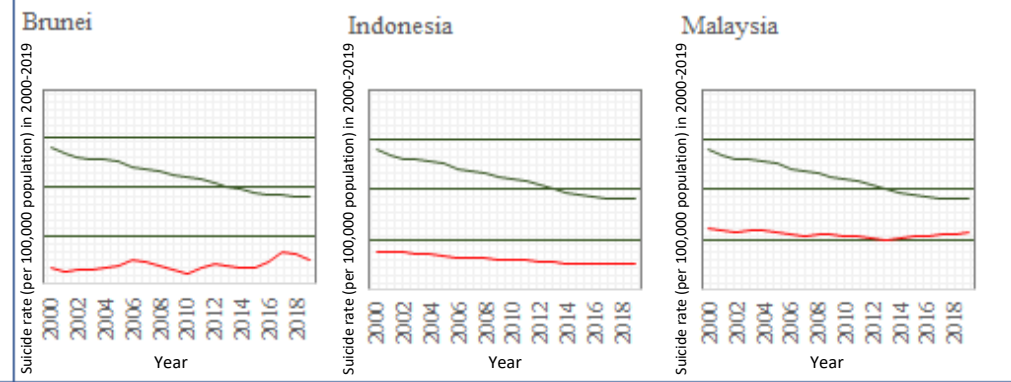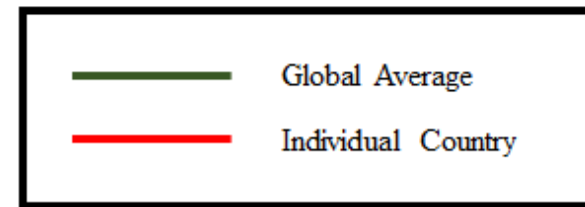

Source: WHO Global Health Estimates
